# Supplementary material
Source: publisher figshare collection journal article supplement (https://rs.figshare.com/ndownloader/files/11082095)
Supplement: Supplementary file 1 [file 11082095]

## Sheet: Identifyer
Title	Urea hydrolysis by gut bacteria in a hibernating frog: Evidence for urea-nitrogen recycling in Amphibia
Authors	Wiebler JM, Kohl KD, Lee RE, Costanzo JP
Journal	Proceedings of the Royal Society B
DOI	10.1098/rspb.2018-0241

## Sheet: ESM Table 1
id	gut segment	urease activity (mU/ml)	urease (mU)	bacteria (cell count)	mass (mg)	length (mm)
15	hindgut	13.8301	3.46	177000000	8.1	17.5
16	hindgut	35.1202	8.78	169000000	7.5	22.3
17	hindgut	17.6603	4.42	NA	8.25	15.4
18	hindgut	11.6833	2.92	240000000	9.95	7.4
19	hindgut	31.25	7.81	92700000	7.35	10.1
20	hindgut	19.1333	4.78	118000000	6.46	10.6
21	hindgut	6.45	1.61	30900000	7.16	9
22	hindgut	40.5333	10.13	77300000	6.78	10.2
23	hindgut	10.7	2.68	119000000	6.46	9.7
24	hindgut	8.42188	2.11	94000000	6.34	12.3
15	midgut	0.00667735	0	164000000	17.7	72.2
16	midgut	0.0346154	0	222000000	11.4	37.7
17	midgut	NA	NA	NA	17.49	59.8
18	midgut	0.427564	0.05	11200000	18.1	48.9
19	midgut	0.15	0.02	4000000	14.75	39.8
20	midgut	0.00507479	0	8400000	14.09	39.3
21	midgut	0.0614316	0.01	16200000	18.35	41.5
22	midgut	0	0	5400000	15.1	42.6
23	midgut	0	0	3000000	15.57	35.8
24	midgut	0	0	6000000	11.86	44.4
15	foregut	0.00833333	0	9200000	30.5	29.5
16	foregut	0.0106838	0	889000	21	19.9
17	foregut	NA	NA	NA	23.8	23.1
18	foregut	0.241026	0.03	7000000	28.84	24.6
19	foregut	0.236432	0.03	5600000	27.14	21.8
20	foregut	0.00160256	0	800000	20.17	19.4
21	foregut	0.0017094	0	400000	20.48	19.8
22	foregut	0.000213675	0	600000	22.65	17.3
23	foregut	0.00320513	0	3600000	29.02	22.2
24	foregut	0	0	200000	18.91	15.3

## Sheet: Validation Exp.
id	group	urease activity (mU/ml)
15	acetohydroxamic acid	0.333333
18	acetohydroxamic acid	0.166667
19	acetohydroxamic acid	0.5
20	acetohydroxamic acid	0.5
23	acetohydroxamic acid	0.333333
15	heat	0.205128
18	heat	0.153846
19	heat	0.153846
20	heat	0
23	heat	0
15	control	12.5128
18	control	10.3077
19	control	21.2308
20	control	14.3077
23	control	6.79487

## Sheet: ESM Fig. 1
id	alternate id	group	temperature (℃)	urease activity (mU/ml)	lysate protein (µg/ml)	urease activity (mU/mg protein)
9,10,11	1	frog	20	17.05	199.131	85.63
7,12,13	2	frog	20	23.51	190.611	123.34
6,8,14	3	frog	20	17.44	155.932	111.82
9,10,11	1	frog	5	8.21	199.131	41.2
7,12,13	2	frog	5	11.67	190.611	61.25
6,8,14	3	frog	5	7.86	155.932	50.41
9,10,11	1	frog	0	5.22	199.131	26.2
7,12,13	2	frog	0	9.49	190.611	49.77
6,8,14	3	frog	0	5.55	155.932	35.59
4,5,8	4	mouse	20	14.03	224.52	62.48
1,7,9	5	mouse	20	36.74	529.307	69.4
2,3,6	6	mouse	20	43.13	517.843	83.28
4,5,8	4	mouse	5	4.54	224.52	20.21
1,7,9	5	mouse	5	16.36	529.307	30.91
2,3,6	6	mouse	5	19.78	517.843	38.2
4,5,8	4	mouse	0	4.21	224.52	18.74
1,7,9	5	mouse	0	12.99	529.307	24.53
2,3,6	6	mouse	0	14.13	517.843	27.29

## Sheet: ESM Urea-loading Exp.
group	id	SBM (g)	SIL (mm)	plasma urea (mmol/l)	urease activity (mU/ml)	urease (mU)	lysate protein (µg/ml)	urease activity (mU/mg protein)	bacteria (cell count)
control	25	12.54	49.56	10.99	0.59	0.15	21.47	27.48	86000000
control	26	12.92	49.17	6.79	0.11	0.03	28.77	3.71	76000000
control	27	13.84	50.59	9.69	6.97	1.74	37.35	186.5	96000000
control	28	14.6	52.89	6.66	4.22	1.06	27.28	154.83	74000000
control	29	15.09	52.31	3.62	1.08	0.27	36.88	29.2	144000000
control	30	16.03	56.57	11.99	0.16	0.04	16.06	10.17	92000000
control	31	17.28	56.83	9.24	3.95	0.99	26.78	147.62	108000000
urea-loaded	32	11.88	50.78	34.16	0.23	0.06	19.2	12.15	74000000
urea-loaded	34	12.06	52.56	48.91	20.9	5.23	52.8	395.81	158000000
urea-loaded	35	13.18	53.43	38.83	0.59	0.15	17.13	34.45	138000000
urea-loaded	36	13.52	55.05	35.27	1.53	0.38	3.9	393.03	40000000
urea-loaded	37	14.43	53.05	34.41	8.17	2.04	31.98	255.37	98000000
urea-loaded	38	16.78	55.56	61.69	8.27	2.07	40.65	203.36	114000000

## Sheet: ESM Fig. 2 & 3
id	group	SBM (g)	SIL (mm)	plasma urea (mmol/l)	urease activity (mU/ml)	urease (mU)	lysate protein (µg/ml)	urease activity (mU/mg protein)	bacteria (cell count)	hindgut (mg)	hindgut (mm)	midgut (mg)	midgut (mm)	foregut (mg)	foregut (mm)	GI tract (mg)	GI tract (mm)
15	hibernating	15.64	50.79	37.32	13.83	3.46	151.92	91.03	177000000	8.1	17.5	17.7	72.2	30.5	29.5	56.3	119.2
16	hibernating	15.6	50.37	26.47	35.12	8.78	129.65	270.89	169000000	7.5	22.3	11.4	37.7	21	19.9	39.9	79.9
17	hibernating	19.37	57.25	25.46	17.66	4.42	188.42	93.73	NA	8.3	15.4	17.5	59.8	23.8	23.1	49.5	98.3
18	hibernating	17.19	58.77	28.39	11.68	2.92	81.46	143.42	240000000	10	7.4	18.1	48.9	28.8	24.6	56.9	80.9
19	hibernating	16.03	54.06	14.56	31.25	7.81	120.74	258.83	92700000	7.4	10.1	14.8	39.8	27.1	21.8	49.2	71.7
20	hibernating	15.47	54.99	34.08	19.13	4.78	114.55	167.02	118000000	6.5	10.6	14.1	39.3	20.2	19.4	40.7	69.3
21	hibernating	14.52	52.59	23.78	6.45	1.61	37.56	171.74	30900000	7.2	9	18.4	41.5	20.5	19.8	46	70.3
22	hibernating	13.8	52.43	22.1	40.53	10.13	111.1	364.84	77300000	6.8	10.2	15.1	42.6	22.7	17.3	44.5	70.1
23	hibernating	14.96	52.78	7.73	10.7	2.68	68.33	156.6	119000000	6.5	9.7	15.6	35.8	29	22.2	51.1	67.7
24	hibernating	13.92	51.74	15.21	8.42	2.11	71.21	118.27	94000000	6.3	12.3	11.9	44.4	18.9	15.3	37.1	72
45	active	11.7	49.29	4.79	6.15	1.54	122	50.41	213000000	8.7	15.4	30.8	51.1	39.5	23.3	79	89.9
46	active	15.68	52.53	3.15	5.17	1.29	56.86	90.87	129000000	13	12.4	65.1	83.6	64.4	25.3	142.5	121.3
47	active	15.27	55.85	3.26	22.58	5.65	175.87	128.41	279000000	9.7	11.6	43.7	58.7	59.2	30.4	112.5	100.6
48	active	12.04	50.81	4.72	10.3	2.58	262.88	39.18	241000000	9	12.4	44.2	52.1	60.6	26.2	113.8	90.6
49	active	16	53.91	6.34	11.6	2.9	137.99	84.06	203000000	10.7	10.1	60.8	53.2	56.9	31.3	128.4	94.6
50	active	16.19	53.51	2.22	9.62	2.4	111.36	86.36	201000000	11.6	13.4	74.5	112.2	62.8	32.2	149	157.8
51	active	15.68	52.41	1.98	2.28	0.57	101.87	22.41	176000000	10.7	13.6	53.4	43	57.8	26	121.9	82.6
52	active	15.27	54.64	2.72	18.45	4.61	239.78	76.95	200000000	11.1	13.4	62.1	38.8	56.2	27.6	129.3	79.8
53	active	15.64	52.97	2.52	NA	NA	231.46	NA	117000000	15.1	19.4	67.9	80.8	48.9	31.6	131.8	131.8
54	active	14.45	51.42	5.24	1.68	0.42	100.09	16.82	93300000	10.9	15.5	51.6	71.1	46.2	30.2	108.7	116.8
